# Supplementary material for: Reactions of cyclopropyl aryl ketones with α-ketoacetic acids catalyzed by C8F17SO3H in fluorous phase
Source: Royal Society of Chemistry journal article supplement (doi:10.1039/b610518a), 2006-01-01
Supplement: b610518a.pdf [file b610518a.pdf]

## Supporting Information

### Reactions of Cyclopropyl Aryl Ketones with $\alpha$ -ketoacetic acids Catalyzed by $C_8F_{17}SO_3H$ in Fluorous Phase

Yong-Hua Yang, Yin-Hao Liu and Min Shi\*

*State Key Laboratory of Organometallic Chemistry,  
Shanghai Institute of Organic Chemistry, Chinese Academy of Sciences,  
354 Fenglin Lu, Shanghai 200032, China.*

[Mshi@mail.sioc.ac.cn](mailto:Mshi@mail.sioc.ac.cn)

#### Typical reaction procedure for Reaction of Cyclopropyl Aryl Ketone with $\alpha$ -ketoacetic acid Catalyzed by $C_8F_{17}SO_3H$ in Fluorous Phase.

To a solution of  $C_8F_{17}SO_3H$  (45 mg, 0.006 mmol) in perfluorodecalin ( $C_{10}F_{18}$ , *cis*- and *trans*-mixture) (solvent, 1.0 mL) was added cyclopropyl aryl ketone (**1**, 0.3 mmol),  $\alpha$ -ketoacetic acid (**2**, 0.3 mmol) and DCE (solvent, 1.0 mL). Then, the mixture was stirred at 60 °C for the necessary time. The fluorous layer was separated for the next reaction. The reaction mixture (organic layer) was washed by water (5 mL) and extracted with dichloromethane (2 x 15 mL). The combined organic layers were dried over anhydrous  $Na_2SO_4$ . The solvent was removed under reduced pressure and the residue was purified by column chromatography on silica gel (EtOAc : hexane = 1 : 4) to give the corresponding product **3**.

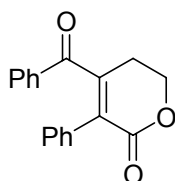

#### 4-Benzoyl-3-phenyl-5,6-dihydropyran-2-one (**3a**):

This compound was obtained as a white solid, yield: 77 mg, 92%. This is a known compound. Its  $^1H$  NMR spectroscopic data are consistent with those reported in our previous paper.<sup>1</sup>  $^1H$  NMR (300 MHz,  $CDCl_3$ , TMS):  $\delta$  2.87 (t,  $J$  = 6.3 Hz, 2H,  $CH_2$ ), 4.63 (t,  $J$  = 6.3 Hz, 2H,  $OCH_2$ ), 7.10-7.13 (m, 3H, Ar), 7.20-7.23 (m, 2H, Ar), 7.26-7.31 (m, 2H, Ar), 7.40-7.45 (m, 1H, Ar), 7.66-7.69 (m, 2H, Ar).

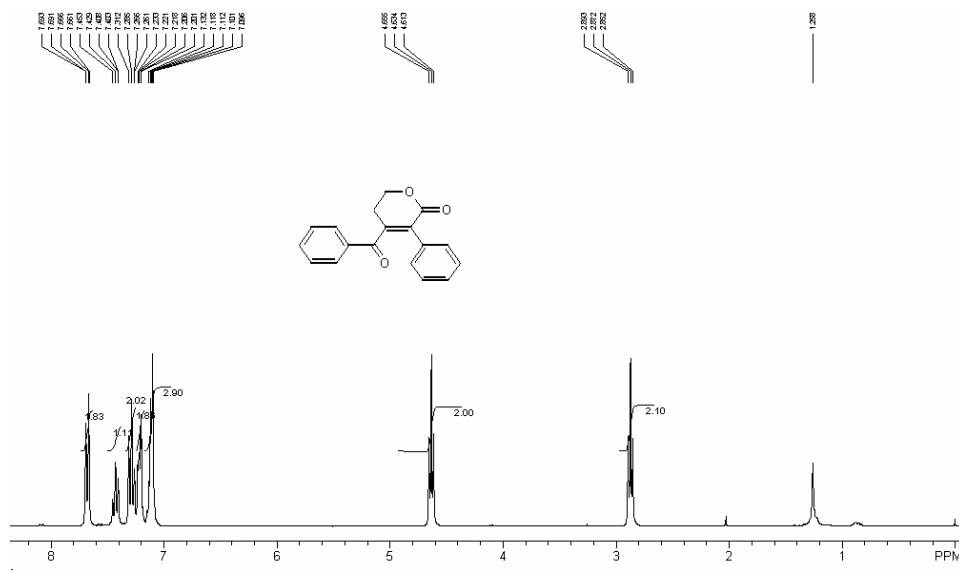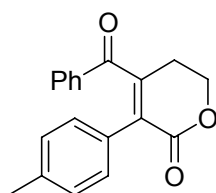

**4-Benzoyl-3-p-tolyl-5,6-dihydropyran-2-one (3b):**

This compound was obtained as a red oil, yield: 70 mg, 80%. This is a known compound. Its  $^1\text{H}$  NMR spectroscopic data are consistent with those reported in our previous paper.<sup>1</sup>  $^1\text{H}$  NMR (300 MHz,  $\text{CDCl}_3$ , TMS):  $\delta$  2.17 (s, 3H,  $\text{CH}_3$ ), 2.87 (t,  $J = 6.3$  Hz, 2H,  $\text{CH}_2$ ), 4.64 (t,  $J = 6.3$  Hz, 2H,  $\text{OCH}_2$ ), 6.93 (d,  $J = 8.1$  Hz, 2H, Ar), 7.11 (d,  $J = 8.1$  Hz, 2H, Ar), 7.31 (t,  $J = 7.5$  Hz, 2H, Ar), 7.46 (t,  $J = 7.5$  Hz, 1H, Ar), 7.70 (d,  $J = 7.8$  Hz, 2H, Ar).

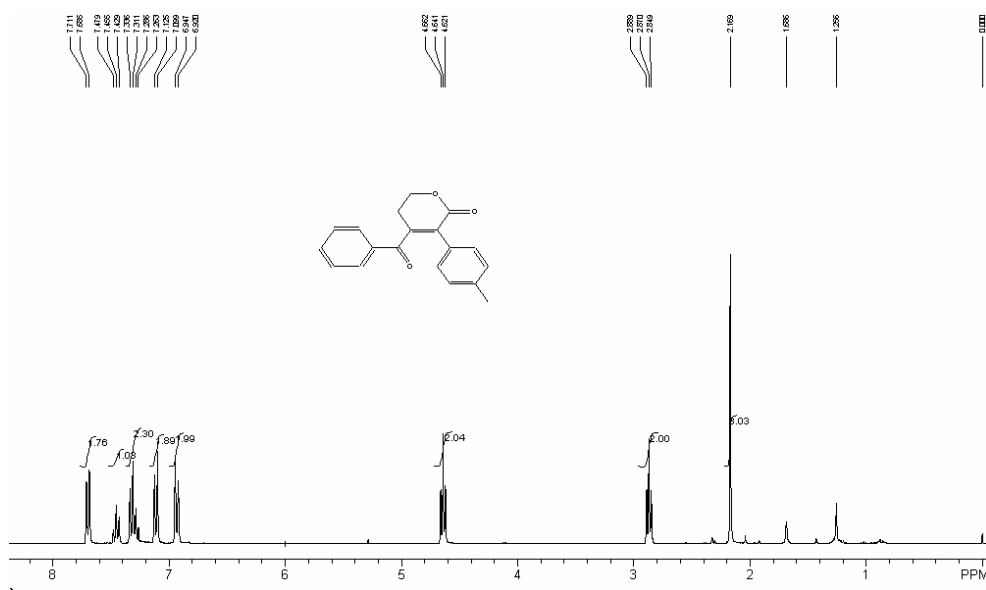

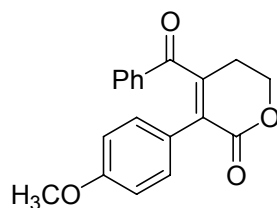

#### 4-Benzoyl-3-(4-methoxy-phenyl)-5,6-dihydropyran-2-one (3c):

This compound was obtained as a pale-red oil, yield: 66 mg, 71%. This is a known compound. Its  $^1\text{H}$  NMR spectroscopic data are consistent with those reported in our previous paper.<sup>1</sup>  $^1\text{H}$  NMR (300 MHz,  $\text{CDCl}_3$ , TMS):  $\delta$  2.88 (t,  $J = 6.0$  Hz, 2H,  $\text{CH}_2$ ), 3.66 (s, 3H,  $\text{OCH}_3$ ), 4.64 (t,  $J = 6.0$  Hz, 2H,  $\text{OCH}_2$ ), 6.65 (d,  $J = 8.1$  Hz, 2H, Ar), 7.17 (d,  $J = 8.1$  Hz, 2H, Ar), 7.30 (t,  $J = 7.5$  Hz, 2H, Ar), 7.42 (t,  $J = 6.9$  Hz, 1H, Ar), 7.69 (d,  $J = 7.4$  Hz, 2H, Ar).

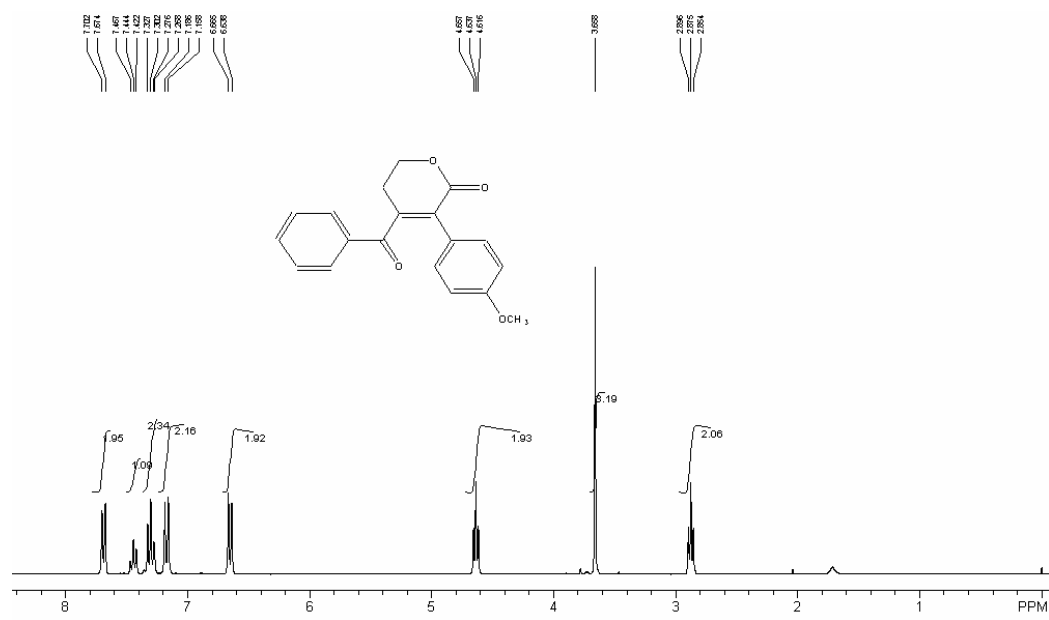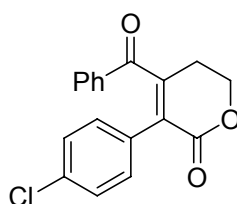

#### 4-Benzoyl-3-(4-chloro-phenyl)-5,6-dihydropyran-2-one (3d):

This compound was obtained as a white solid, yield: 86 mg, 92%. This is a known compound. Its  $^1\text{H}$  NMR spectroscopic data are consistent with those reported in our previous paper.<sup>1</sup>  $^1\text{H}$  NMR (300 MHz,  $\text{CDCl}_3$ , TMS):  $\delta$  2.88 (t,  $J = 6.0$  Hz, 2H,  $\text{CH}_2$ ), 4.65 (t,  $J = 6.0$  Hz, 2H,  $\text{OCH}_2$ ), 7.10 (dd,  $J = 9.0$  Hz,  $J = 2.1$  Hz, 2H, Ar), 7.17 (dd,  $J = 9.0$  Hz,  $J = 2.1$  Hz, 2H, Ar),

7.33 (t,  $J = 7.2$  Hz, 2H, Ar), 7.48 (t,  $J = 7.2$  Hz, 1H, Ar), 7.67-7.70 (m, 2H, Ar).

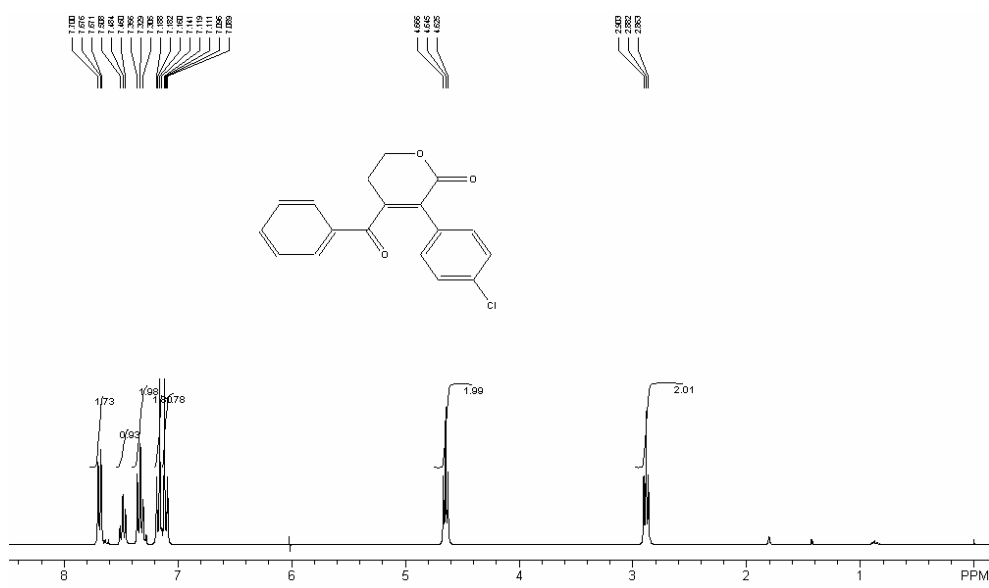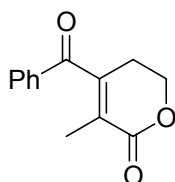

**4-Benzoyl-3-methyl-5,6-dihydro-2H-pyran-2-one (3e):**

This compound was obtained as a yellow oil, yield: 61 mg, 94%. This is a known compound.

Its  $^1\text{H}$  NMR spectroscopic data are consistent with those reported in our previous paper.<sup>1</sup>  $^1\text{H}$  NMR (300 MHz,  $\text{CDCl}_3$ , TMS):  $\delta$  1.81 (s, 3H,  $\text{CH}_3$ ), 2.70 (t,  $J = 6.6$  Hz, 2H,  $\text{CH}_2$ ), 4.54 (t,  $J = 6.6$  Hz, 2H,  $\text{OCH}_2$ ), 7.53-7.58 (m, 2H, Ar), 7.67-7.70 (m, 1H, Ar), 7.89-7.93 (m, 2H, Ar).

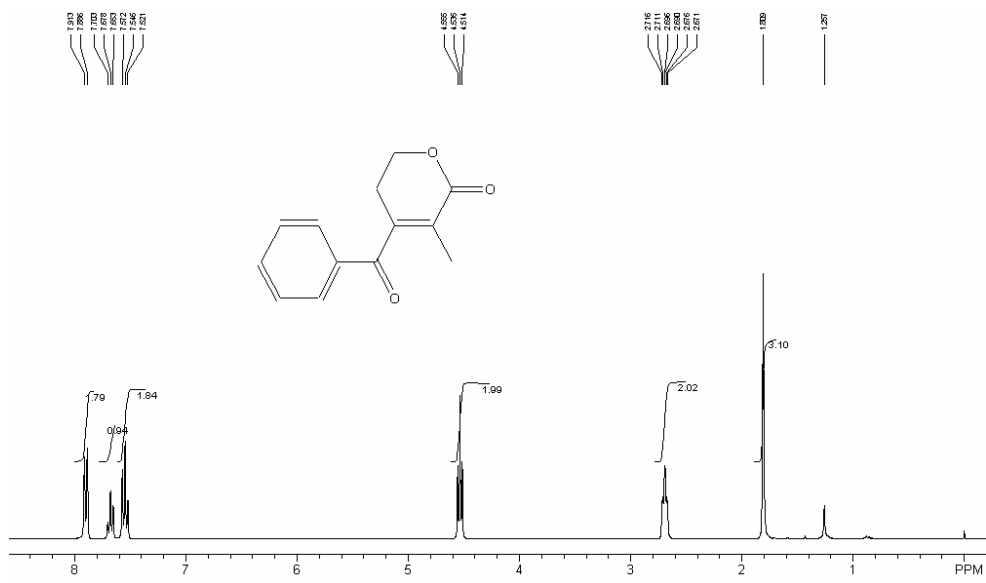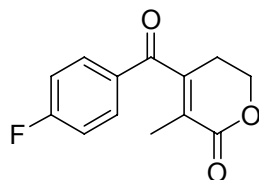

#### 4-(4-Fluoro-benzoyl)-3-methyl-5,6-dihydropyran-2-one (3f):

This compound was obtained as a white solid, yield: 50 mg, 71%. This is a known compound. Its <sup>1</sup>H NMR spectroscopic data are consistent with those reported in our previous paper.<sup>1</sup> <sup>1</sup>H NMR (300 MHz, CDCl<sub>3</sub>, TMS): δ 1.81 (t, *J* = 1.5 Hz, 3H, CH<sub>3</sub>), 2.70 (dt, *J* = 1.5 Hz, *J* = 6.0 Hz, 2H, CH<sub>2</sub>), 4.55 (t, *J* = 6.0 Hz, 2H, OCH<sub>2</sub>), 7.21-7.26 (m, 2H, Ar), 7.93-7.98 (m, 2H, Ar).

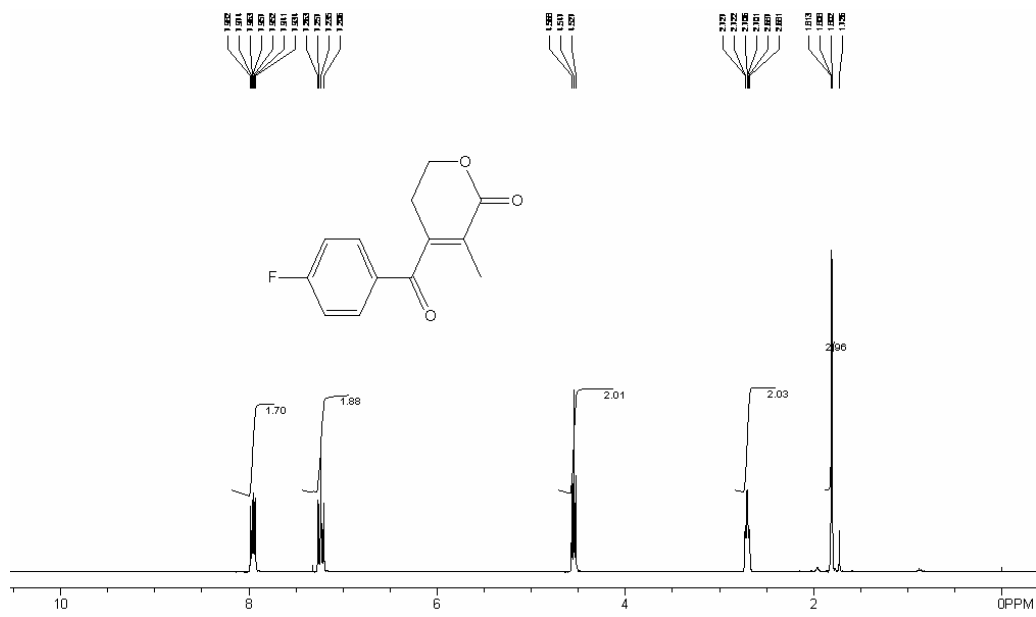

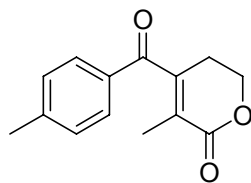

**3-Methyl-4-(4-methyl-benzoyl)-5,6-dihydropyran-2-one (3g):**

This compound was obtained as a white solid, yield: 64 mg, 93%. This is a known compound. Its  $^1\text{H}$  NMR spectroscopic data are consistent with those reported in our previous paper.<sup>1</sup>  $^1\text{H}$  NMR (300 MHz,  $\text{CDCl}_3$ , TMS):  $\delta$  1.80 (s, 3H,  $\text{CH}_3$ ), 2.46 (s, 3H,  $\text{CH}_3$ ), 2.69 (dt,  $J = 1.2$  Hz,  $J = 6.0$  Hz, 2H,  $\text{CH}_2$ ), 4.53 (t,  $J = 6.0$  Hz, 2H,  $\text{OCH}_2$ ), 7.34 (d,  $J = 7.8$  Hz, 2H, Ar), 7.80 (t,  $J = 7.8$  Hz, 2H, Ar).

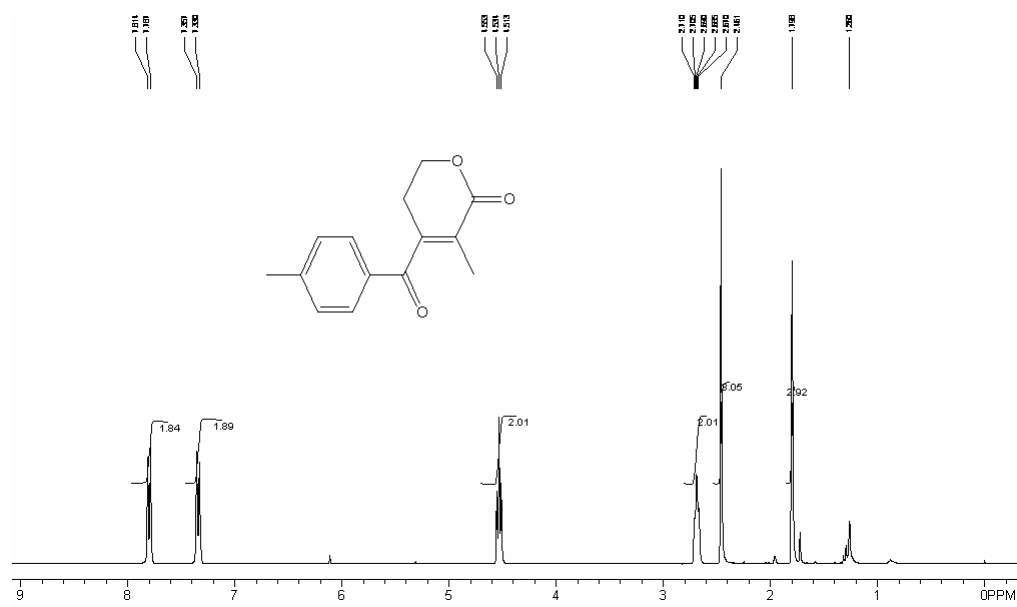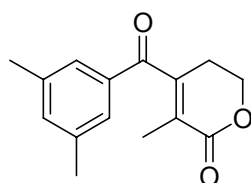

**4-(3,5-Dimethyl-benzoyl)-3-methyl-5,6-dihydropyran-2-one (3h):**

This compound was obtained as a white solid, yield: 63 mg, 86%. This is a known compound. Its  $^1\text{H}$  NMR spectroscopic data are consistent with those reported in our previous paper.<sup>1</sup>  $^1\text{H}$  NMR (300 MHz,  $\text{CDCl}_3$ , TMS):  $\delta$  1.80 (s, 3H,  $\text{CH}_3$ ), 2.40 (s, 6H,  $\text{CH}_3$ ), 2.69 (dt,  $J = 1.8$  Hz,  $J = 6.0$  Hz, 2H,  $\text{CH}_2$ ), 4.54 (t,  $J = 6.0$  Hz, 2H,  $\text{OCH}_2$ ), 7.30 (s, 1H, Ar), 7.49 (s, 2H, Ar).

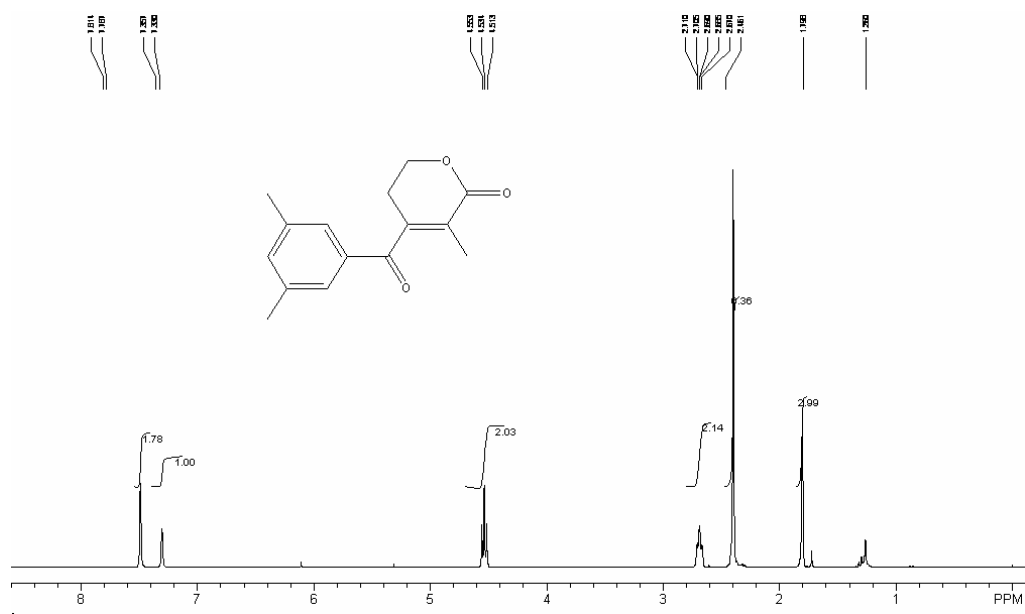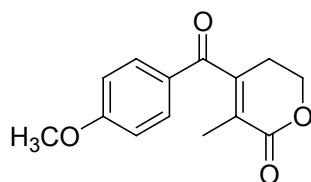

**4-(4-Methoxy-benzoyl)-3-methyl-5,6-dihydropyran-2-one (3i):**

This compound was obtained as a pale oil, yield: 66 mg, 89%. This is a known compound. Its  $^1\text{H}$  NMR spectroscopic data are consistent with those reported in our previous paper.<sup>1</sup>  $^1\text{H}$  NMR (300 MHz,  $\text{CDCl}_3$ , TMS):  $\delta$  1.80 (t,  $J = 1.8$  Hz, 3H,  $\text{CH}_3$ ), 2.69 (dt,  $J = 1.8$  Hz,  $J = 6.3$  Hz, 2H,  $\text{CH}_2$ ), 3.92 (s, 3H,  $\text{OCH}_3$ ), 4.53 (t,  $J = 6.3$  Hz, 2H,  $\text{OCH}_2$ ), 7.01 (dd,  $J = 7.2$  Hz,  $J = 2.1$  Hz, 2H, Ar), 7.88 (dd,  $J = 7.2$  Hz,  $J = 2.1$  Hz, 2H, Ar).

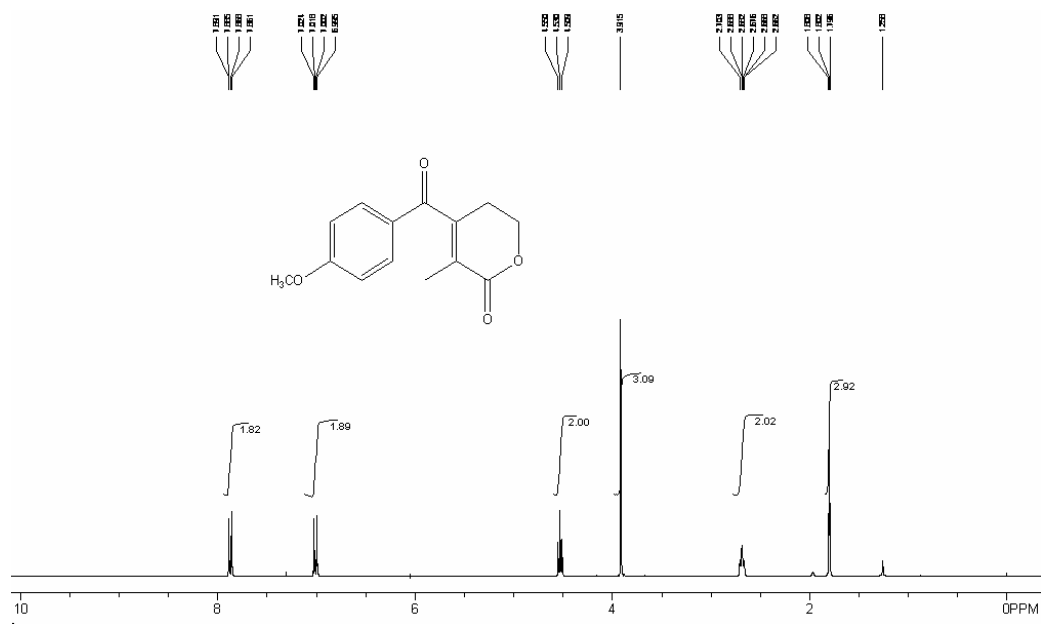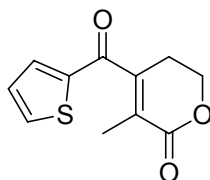

**3-Methyl-4-(thiophene-2-carbonyl)-5,6-dihydropyran-2-one (3j):**

This compound was obtained as a white solid, yield: 37 mg, 56%. This is a known compound. Its  $^1\text{H}$  NMR spectroscopic data are consistent with those reported in our previous paper.<sup>1</sup>  $^1\text{H}$  NMR (300 MHz,  $\text{CDCl}_3$ , TMS):  $\delta$  1.89 (d,  $J = 1.8$  Hz, 3H,  $\text{CH}_3$ ), 2.73 (dt,  $J = 1.8$  Hz,  $J = 6.0$  Hz, 2H,  $\text{CH}_2$ ), 4.53 (t,  $J = 6.0$  Hz, 2H,  $\text{OCH}_2$ ), 7.22 (dd,  $J = 5.1$  Hz,  $J = 3.9$  Hz, 1H, Ar), 7.67 (dd,  $J = 3.9$  Hz,  $J = 1.2$  Hz, 1H, Ar), 7.67 (dd,  $J = 5.1$  Hz,  $J = 1.2$  Hz, 1H, Ar).



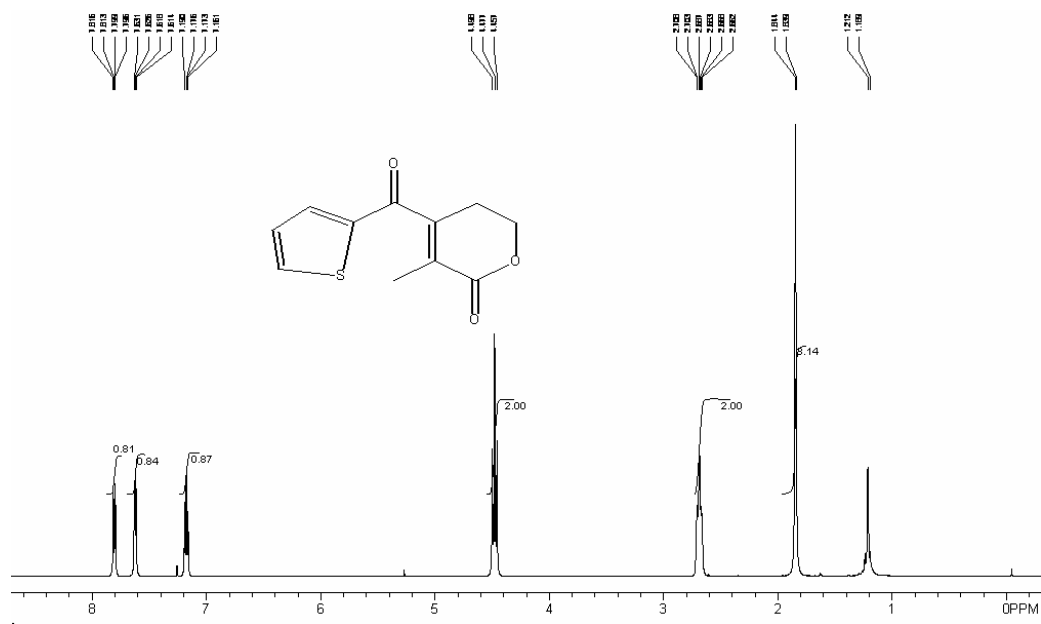

## References and Notes

1. Yang, Y.-H.; Shi, M. *J. Org. Chem.* **2006**, *70*, 10082-10085.
